# Supplementary material for: High-performance zinc–air batteries enabled by hybridizing atomically dispersed FeN2 with Co3O4 nanoparticles
Source: Royal Society of Chemistry journal article supplement (doi:10.1039/d2ta08305a), 2022-12-07
Supplement: d2ta08305a1.pdf [file d2ta08305a1.pdf]

## Supporting Information

### High-performance zinc-air batteries enabled by hybridizing atomically dispersed FeN<sub>2</sub> with Co<sub>3</sub>O<sub>4</sub> nanoparticles

*Fukang Gui,<sup>a‡</sup> Qiu Jin,<sup>b‡</sup> Dongdong Xiao,<sup>c</sup> Zehua Jin,<sup>d</sup> Yingchuan Zhang,<sup>a</sup> Yingjian Cao,<sup>a</sup> Ming Yang,<sup>d</sup> Qinggang Tan,<sup>e</sup> Cunman Zhang,<sup>a</sup> Samira Siahrostami,<sup>b\*</sup> and Qiangfeng Xiao<sup>a\*</sup>*

---

<sup>a</sup>School of Automotive Studies & Clean Energy Automotive Engineering Center, Tongji University (Jiading Campus), 4800 Cao'an Road, Shanghai 201804, China

<sup>b</sup>Department of Chemistry, University of Calgary, 2500 University Drive NW, Calgary, Alberta, Canada, T2N 1N4

<sup>c</sup>Institute of Physics, Chinese Academy of Sciences, 8 Nansan Street, Zhongguancun, Haidian District, Beijing, 100190, China

<sup>d</sup> Department of Chemical & Biomolecular Engineering, College of Engineering, Computing and Applied Sciences, Clemson University, 206 S. Palmetto Blvd, Clemson, SC 29634, USA

<sup>e</sup> School of Materials Science & Engineering, Tongji University (Jiading Campus), 4800 Cao'an Road, Shanghai, 201804, China

\*Corresponding Authors. E-mail: xiaoqf@tongji.edu.cn (Q.X.); samira.siahrostami@ucalgary.ca (S.S.).

‡These authors contributed equally to this work

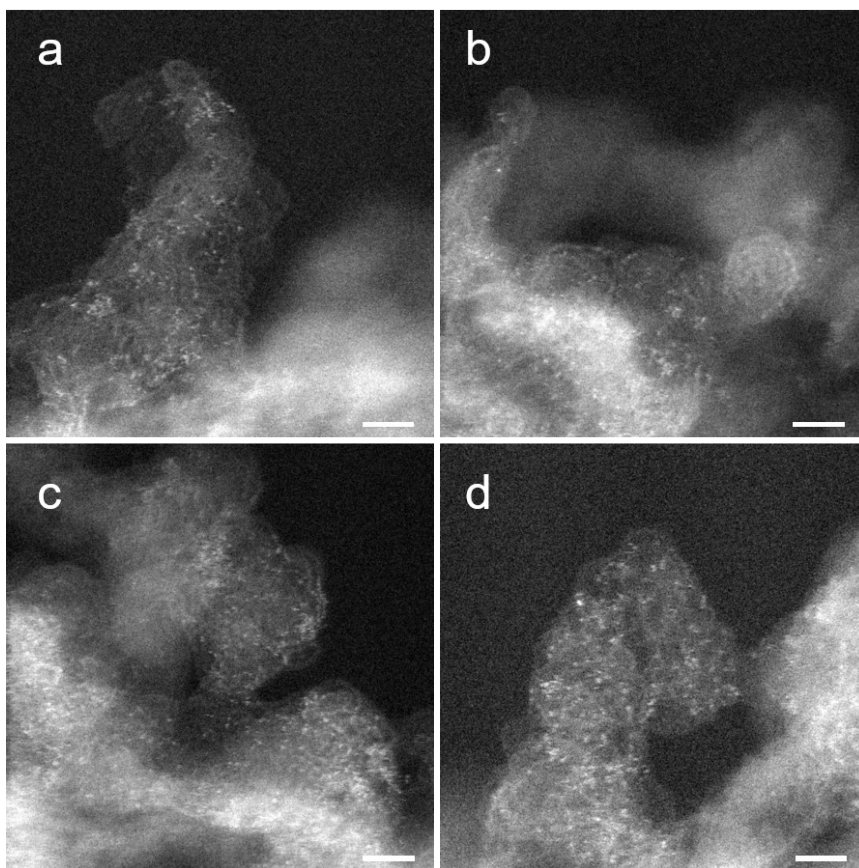

**Fig. S1 (a-d)** Aberration-corrected HAADF-STEM images of Fe-HPNC. Scale bar: 2 nm.

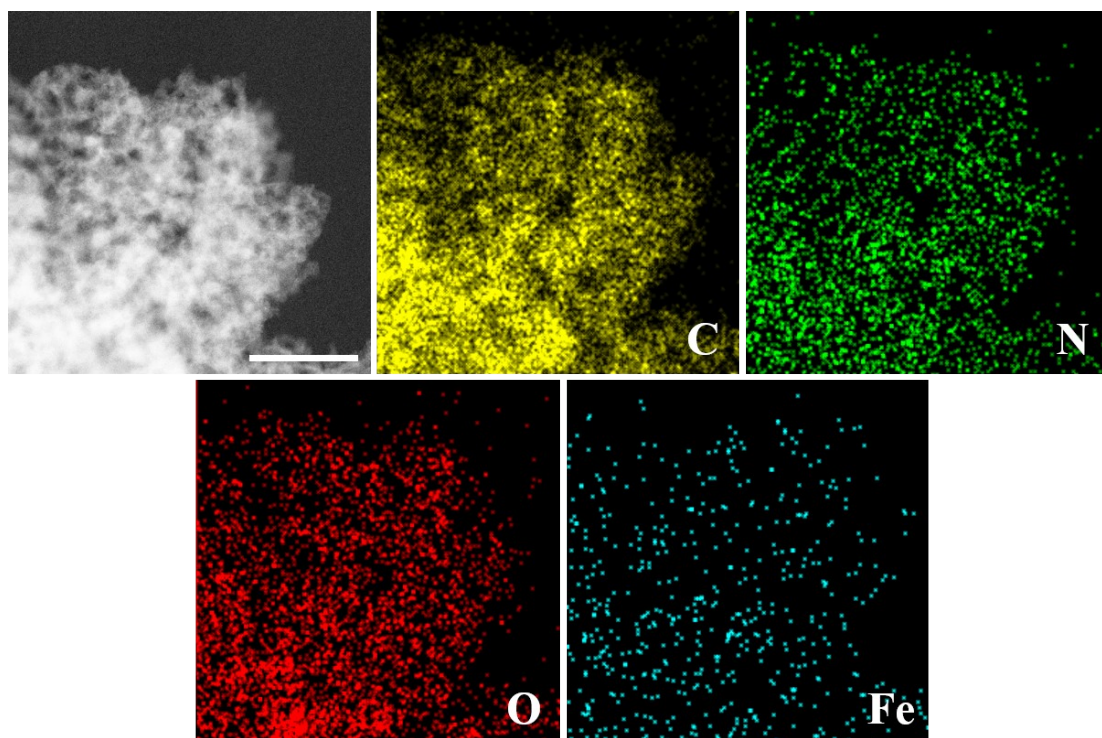

**Fig. S2** STEM image and corresponding elemental mapping images of Fe-HPNC. Scale bar, 50 nm.

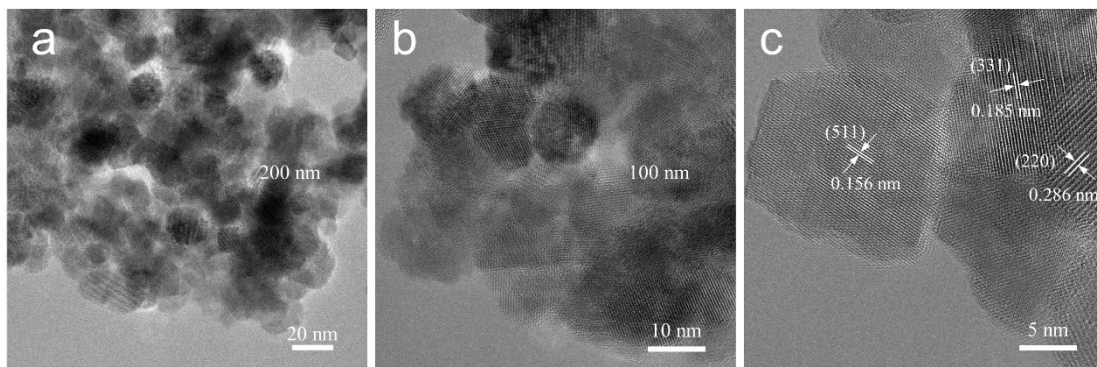

**Fig. S3 (a-c)** TEM and HR-TEM images of pure as-prepared  $\text{Co}_3\text{O}_4$  nanoparticles.

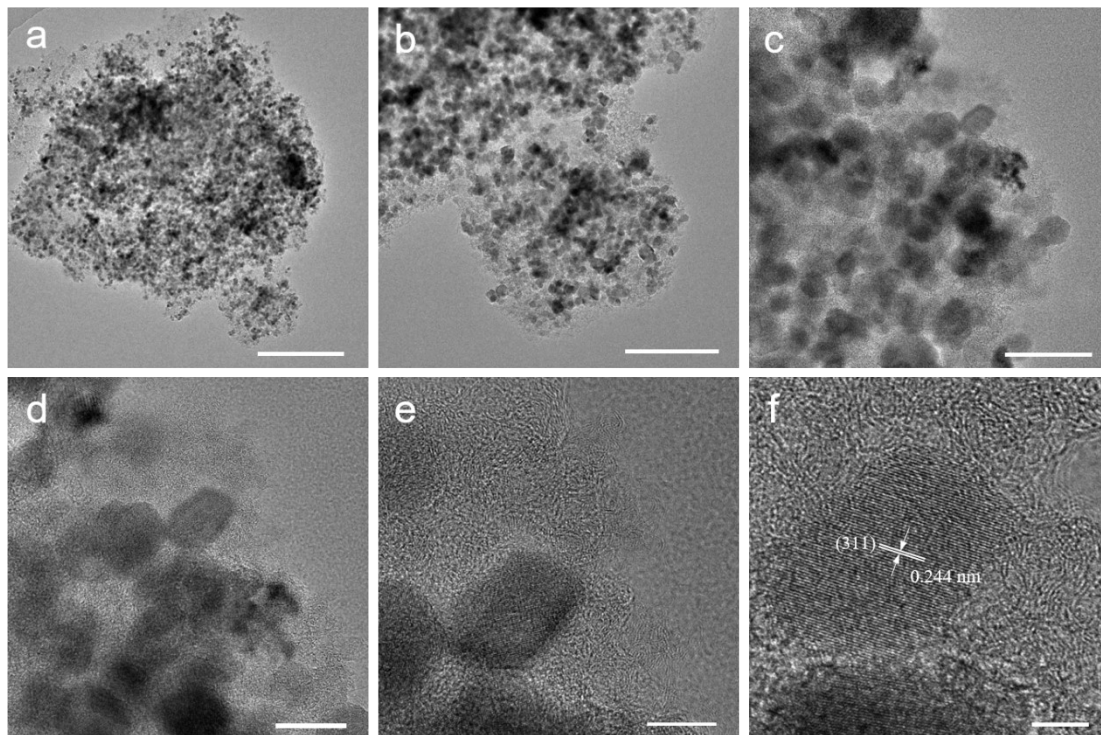

**Fig. S4 (a-f)** TEM and HR-TEM images of Fe-HPNC/Co<sub>3</sub>O<sub>4</sub>. Scale bar: (a) 500 nm, (b) 200 nm, (c) 50 nm, (d) 20 nm, (e) 10 nm, (f) 5 nm.

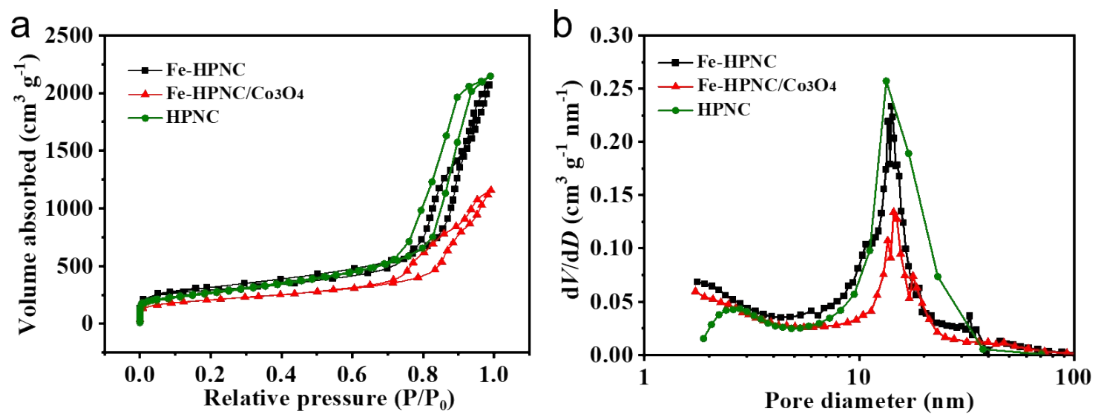

**Fig. S5 (a)** Nitrogen adsorption-desorption isotherms and **(b)** corresponding pore size distribution curves of Fe-HPNC, Fe-HPNC/Co<sub>3</sub>O<sub>4</sub> and HPNC.

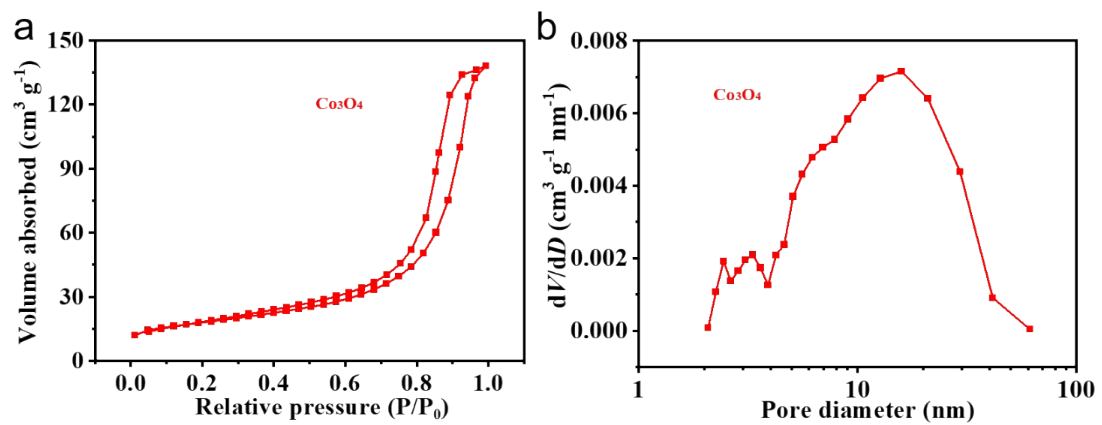

**Fig. S6 (a)** Nitrogen adsorption-desorption isotherms and **(b)** corresponding pore size distribution curves of  $\text{Co}_3\text{O}_4$  nanoparticles.

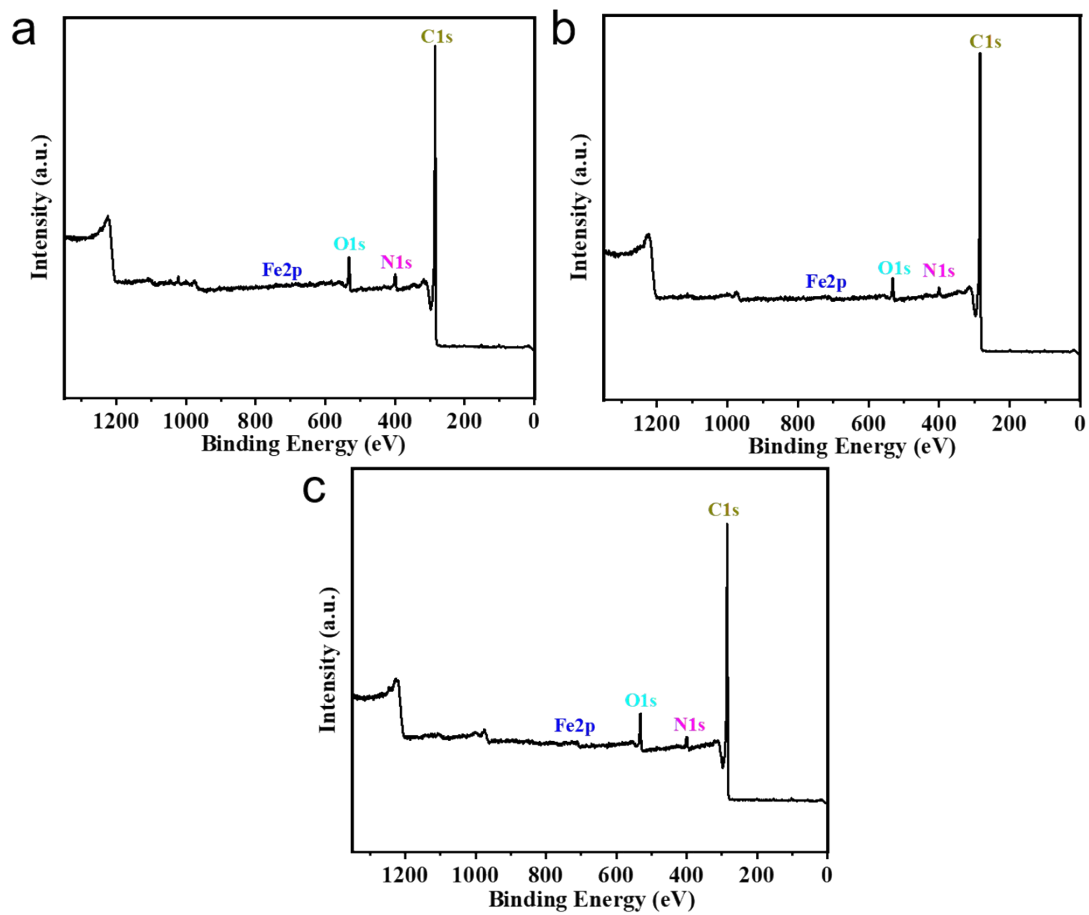

**Fig. S7** XPS survey spectra of (a) Fe-HPNC-700, (b) Fe-HPNC-800 and (c) Fe-HPNC-900.



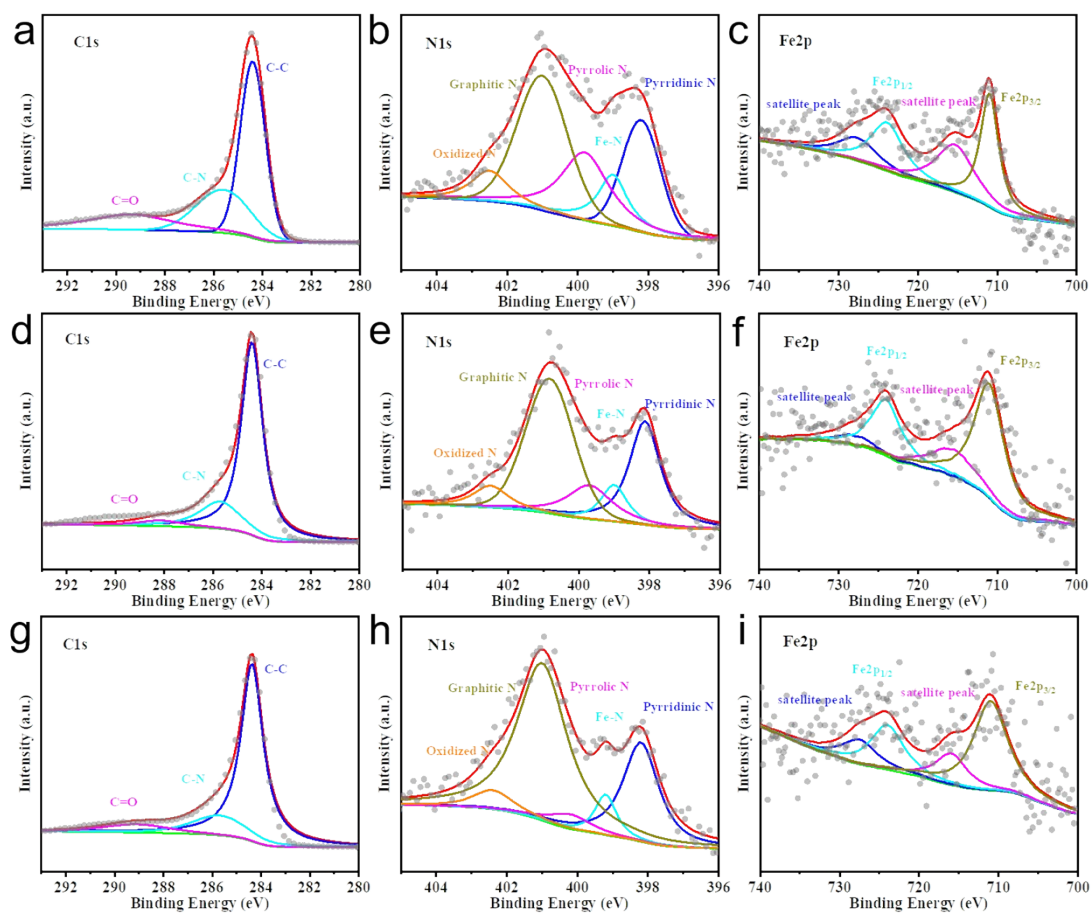

**Fig. S8** High-resolution C1s, N1s and Fe 2p spectra of **(a,b,c)** Fe-HPNC-700, **(d,e,f)** Fe-HPNC-800 and **(g,h,i)** Fe-HPNC-900.

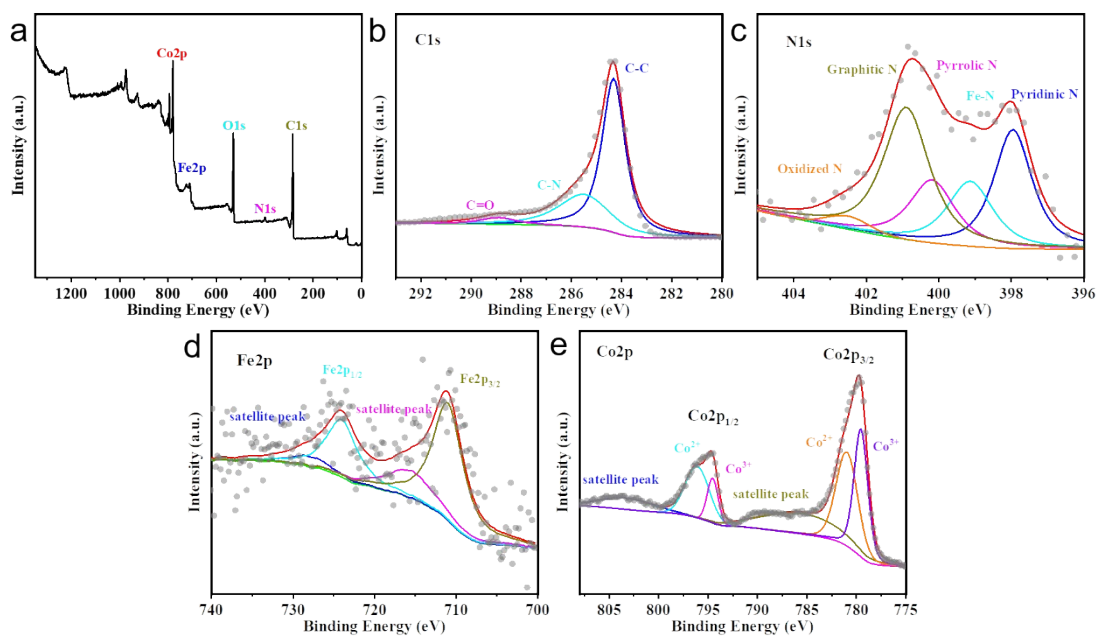

**Fig. S9** (a) XPS survey spectra and high-resolution (b) C 1s, (c) N 1s, (d) Fe 2p and (e) Co 2p spectra of Fe-HPNC/Co<sub>3</sub>O<sub>4</sub>.

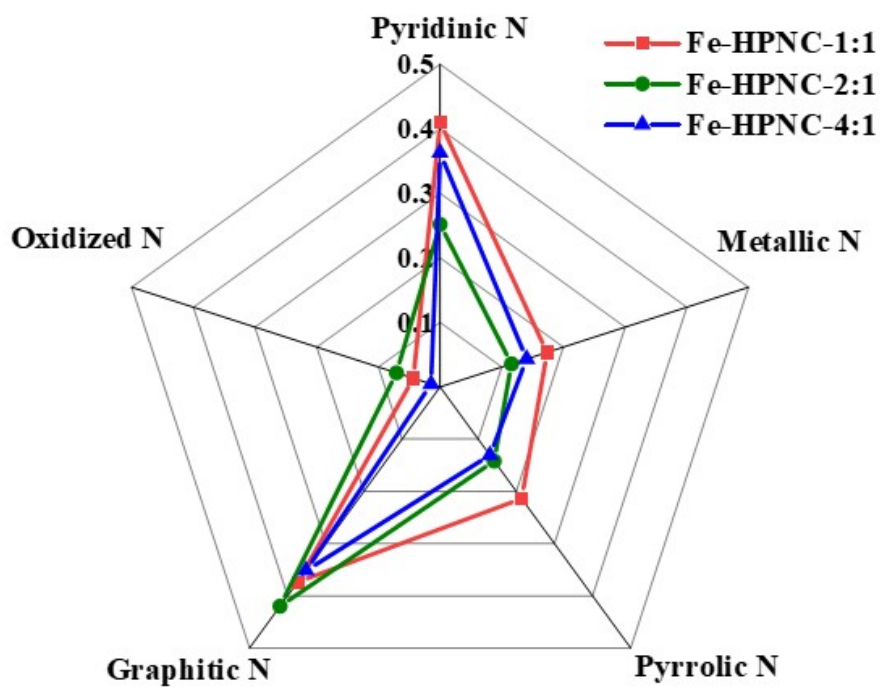

**Fig. S10** Configurations of nitrogen dopants of Fe-HPNC-1:1, Fe-HPNC-2:1 and Fe-HPNC-4:1.

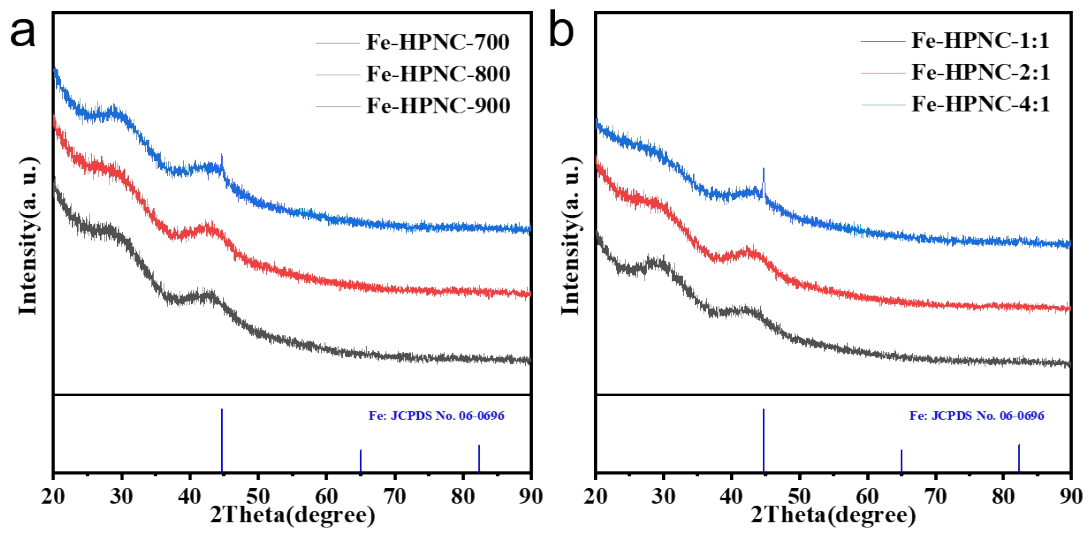

**Fig. S11** XRD patterns of (a) Fe-HPNC-700, Fe-HPNC-800, Fe-HPNC-900 and (b) Fe-HPNC-1:1, Fe-HPNC-2:1 and Fe-HPNC-4:1.

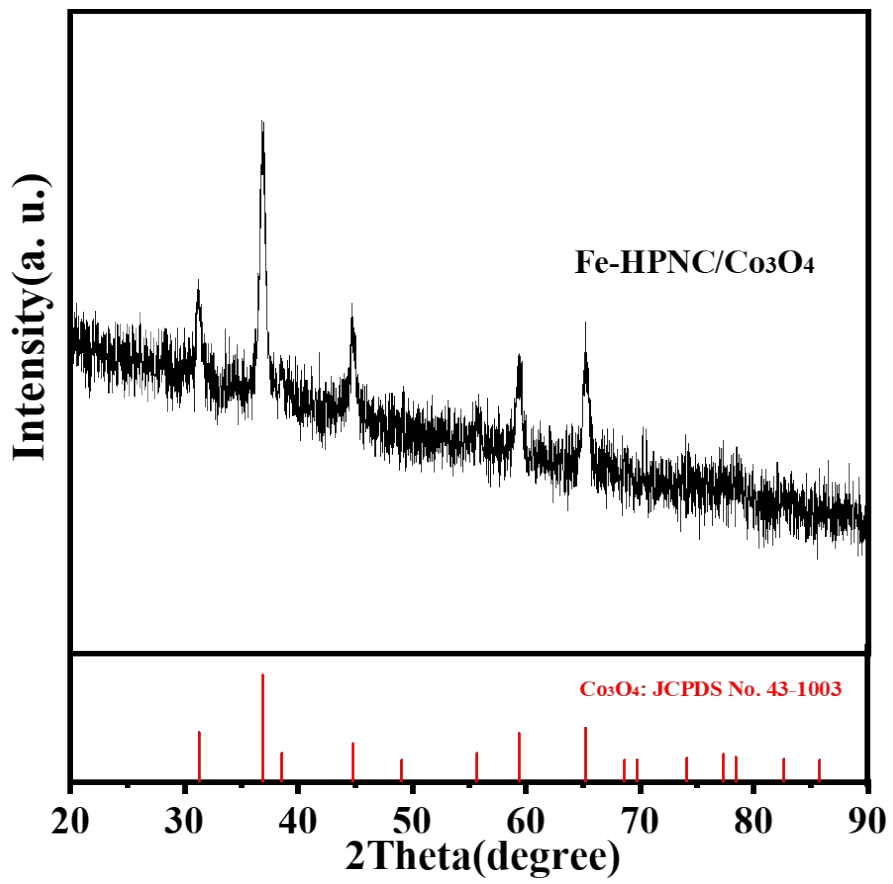

Fig. S12 XRD pattern of Fe-HPNC/Co<sub>3</sub>O<sub>4</sub>.

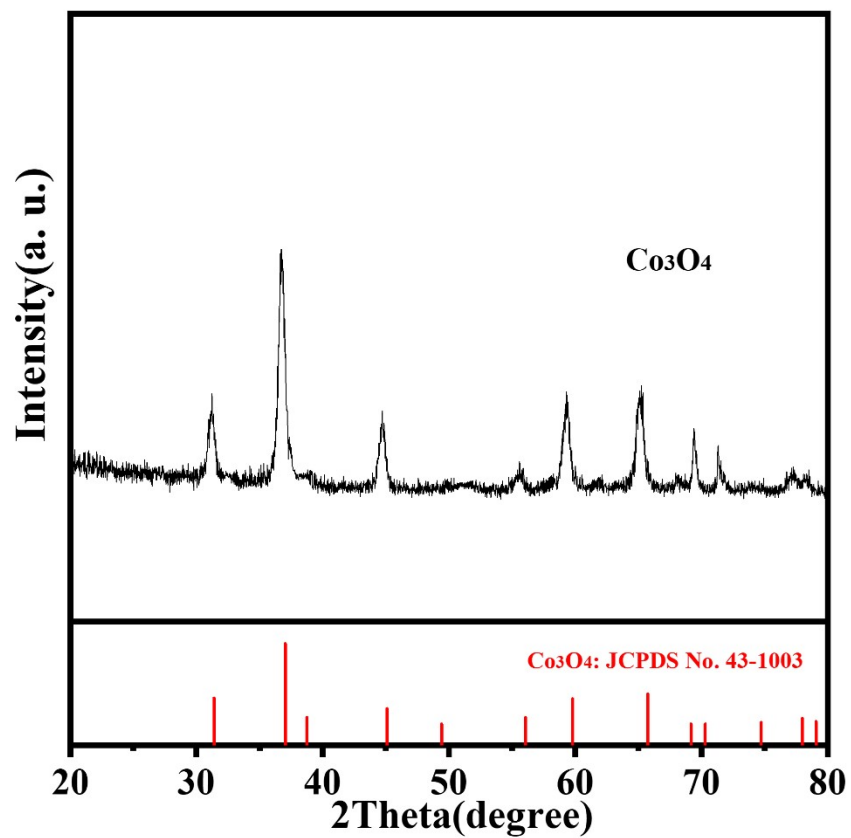

**Fig. S13** XRD pattern of pure as-prepared  $\text{Co}_3\text{O}_4$  nanoparticles.

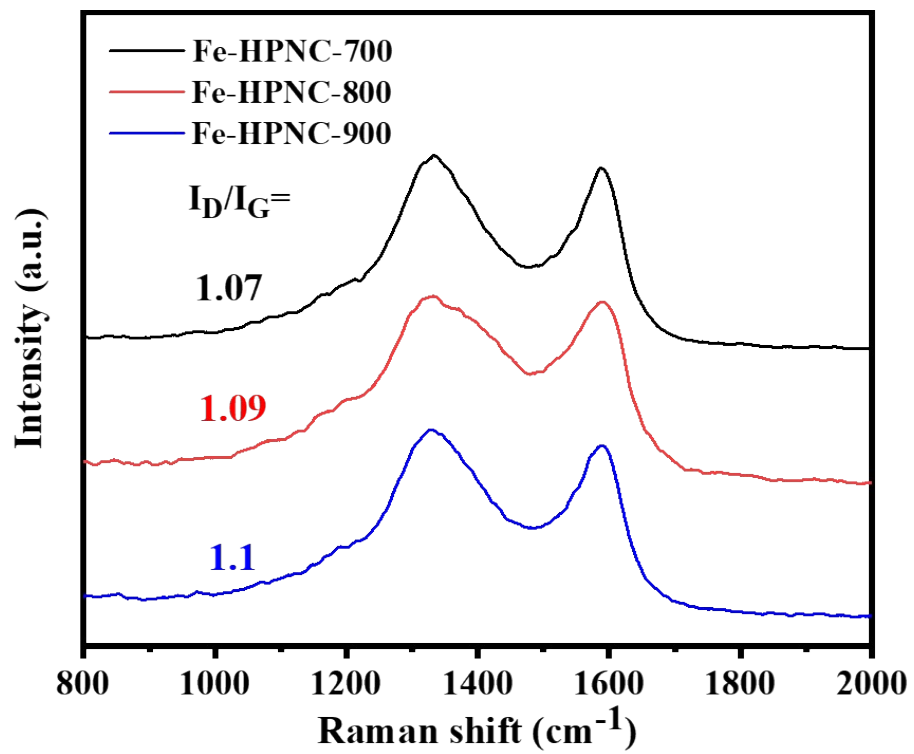

**Fig. S14** Raman spectra of Fe-HPNC-700, Fe-HPNC-800 and Fe-HPNC-900.

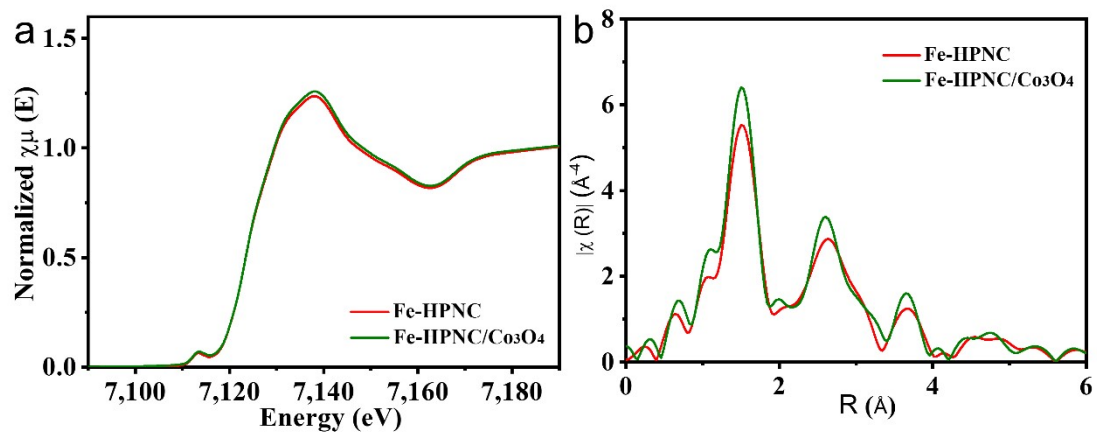

**Fig. S15** Fe k-edge (a) XANES spectra and (b) Fourier-transfer EXAFS spectra of Fe-HPNC and Fe-HPNC/Co<sub>3</sub>O<sub>4</sub>.



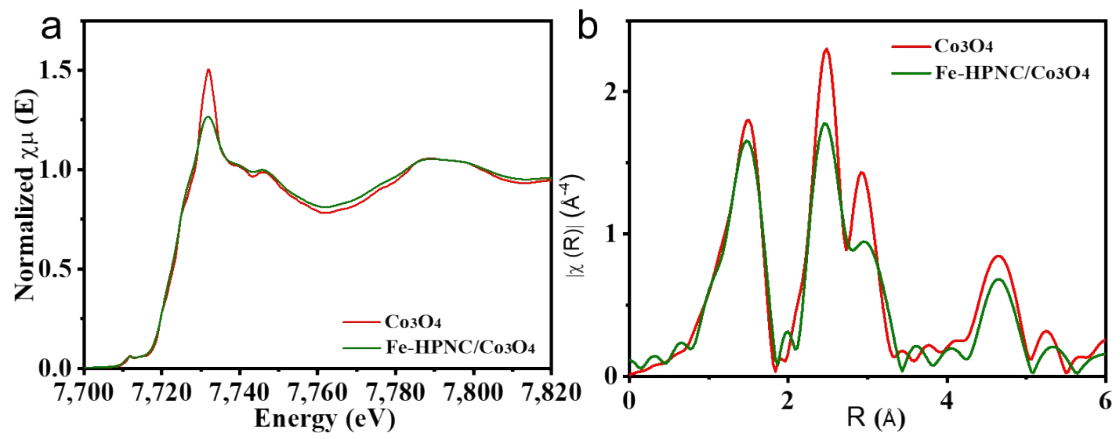

**Fig. S16** Co k-edge (a) XANES spectra and (b) Fourier-transform EXAFS spectra of Fe-HPNC/ $\text{Co}_3\text{O}_4$  and commercial  $\text{Co}_3\text{O}_4$ .

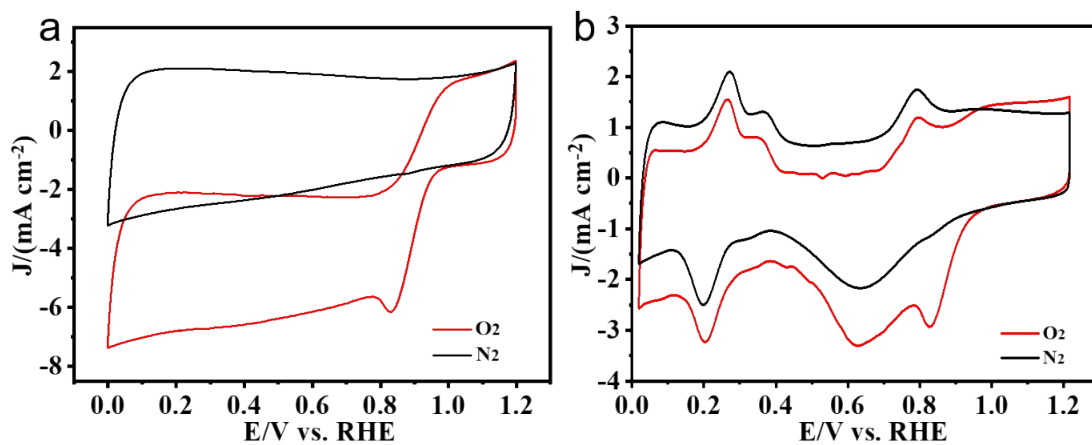

**Fig. S17** Cycle voltammetry (CV) curves of **(a)** Fe-HPNC/Co<sub>3</sub>O<sub>4</sub> and **(b)** Pt/C in 0.1 M KOH solution saturated with oxygen (red lines) and nitrogen (black lines). Scan rate: 50 mV s<sup>-1</sup>.

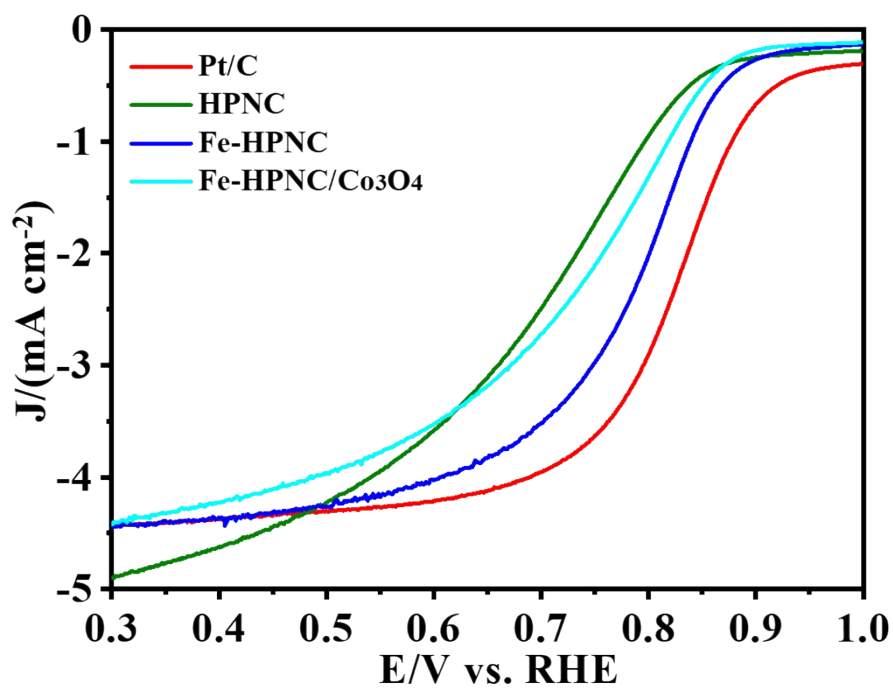

**Fig. S18** ORR polarization curves of various catalysts in O<sub>2</sub>-saturated 0.5 M H<sub>2</sub>SO<sub>4</sub> solution with a rotating speed of 1600 rpm and a scan rate of 10 mV s<sup>-1</sup>.

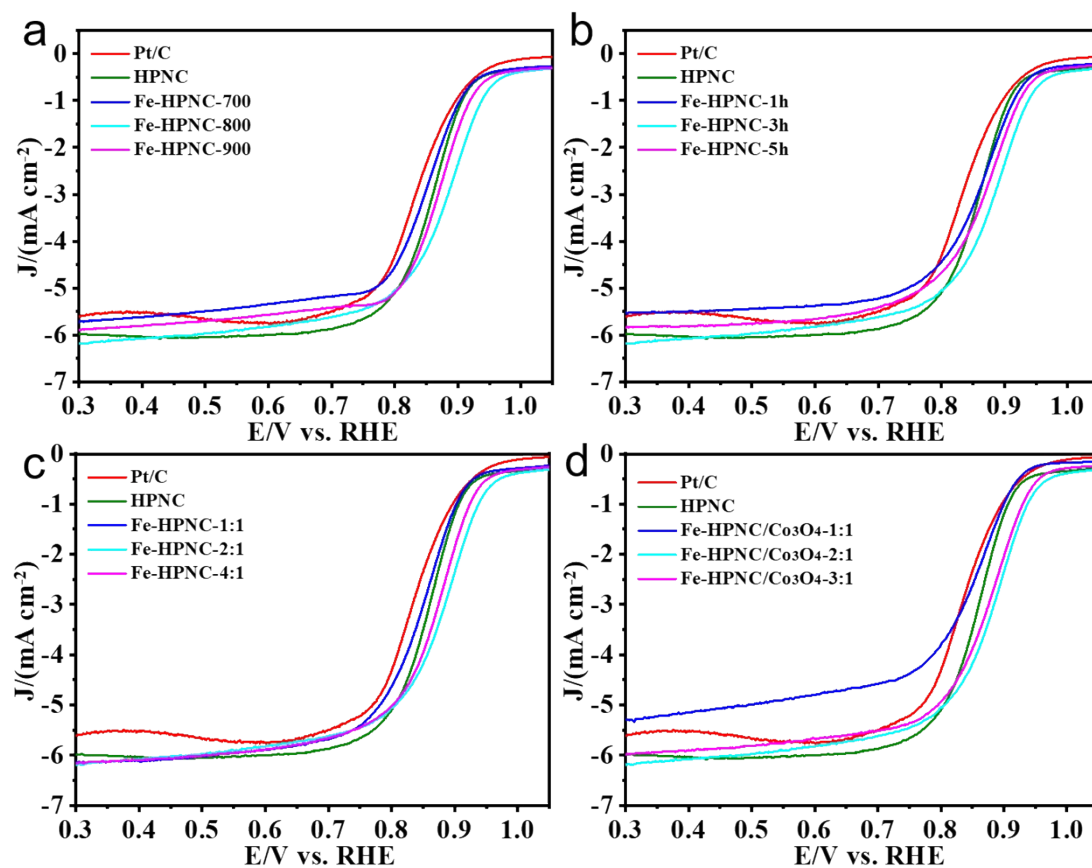

**Fig. S19** ORR polarization curves of various catalysts synthesized with different (a) annealing temperature, (b) annealing time, (c) mass ratios of  $\text{FeCl}_3$  to HPNC and (d) mass ratios of Fe-HPNC to  $\text{Co}_3\text{O}_4$  in  $\text{O}_2$ -saturated 0.1 M KOH solution with a rotating speed of 1600 rpm and a scan rate of  $10 \text{ mV s}^{-1}$ .

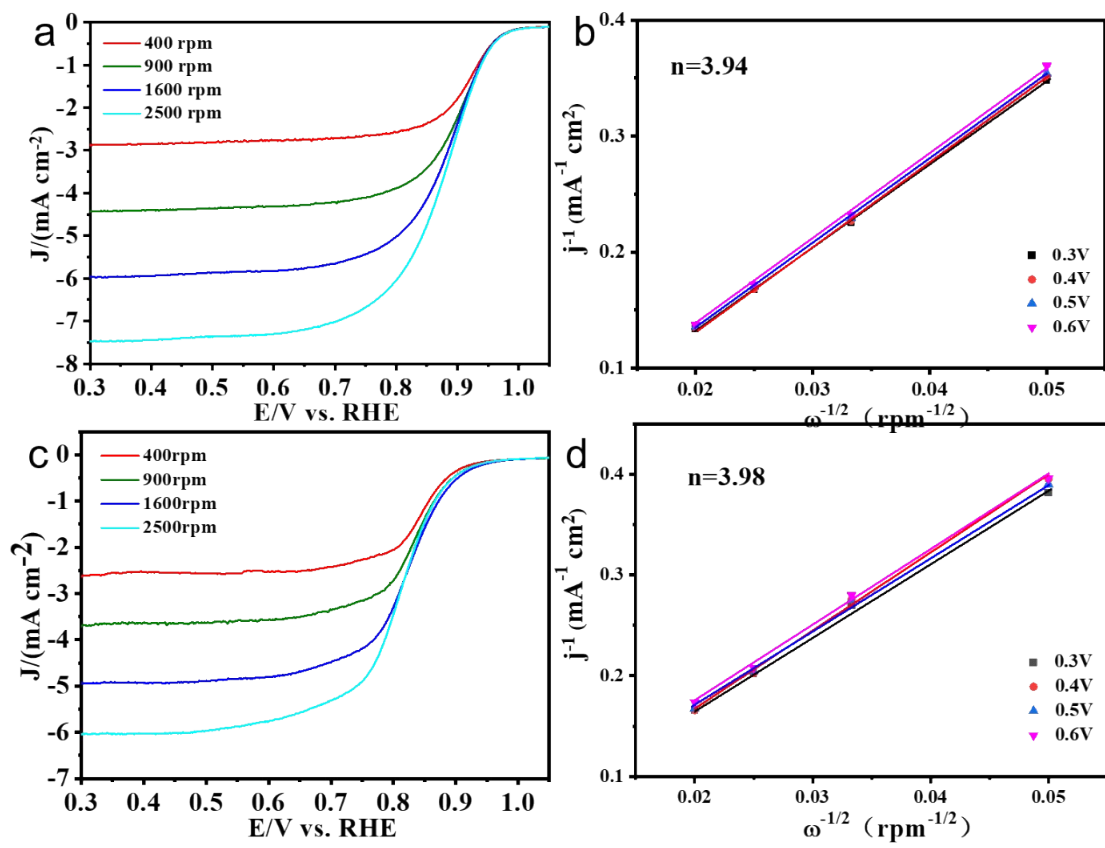

**Fig. S20** ORR polarization curves at various rotating speeds and corresponding K-L plots at various potentials of **(a,b)** Fe-HPNC/Co<sub>3</sub>O<sub>4</sub> and **(c,d)** Pt/C in O<sub>2</sub>-saturated 0.1 M KOH solution.

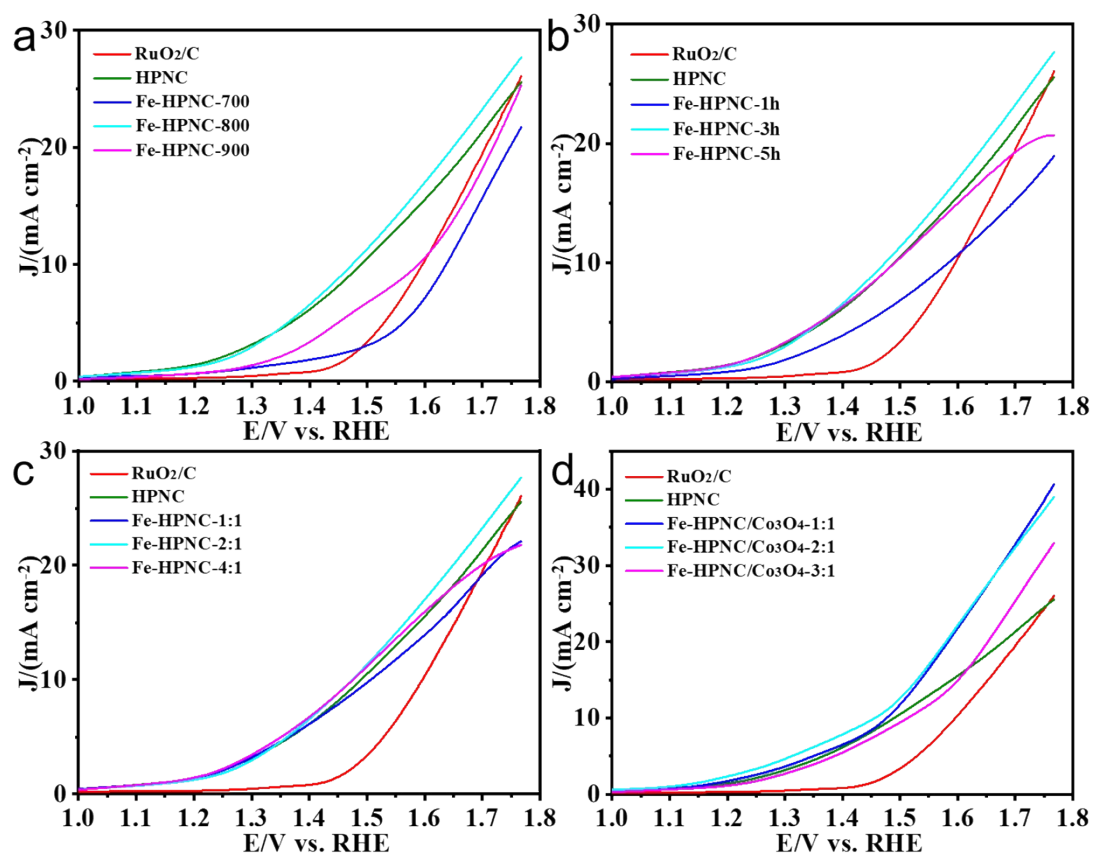

**Fig. S21** OER polarization curves of various catalysts synthesized with different (a) annealing temperature, (b) annealing time, (c) mass ratios of FeCl<sub>3</sub> to HPNC and (d) mass ratios of Fe-HPNC to Co<sub>3</sub>O<sub>4</sub> in O<sub>2</sub>-saturated 0.1 M KOH solution with a rotating speed of 1600 rpm and a scan rate of 10 mV s<sup>-1</sup>.

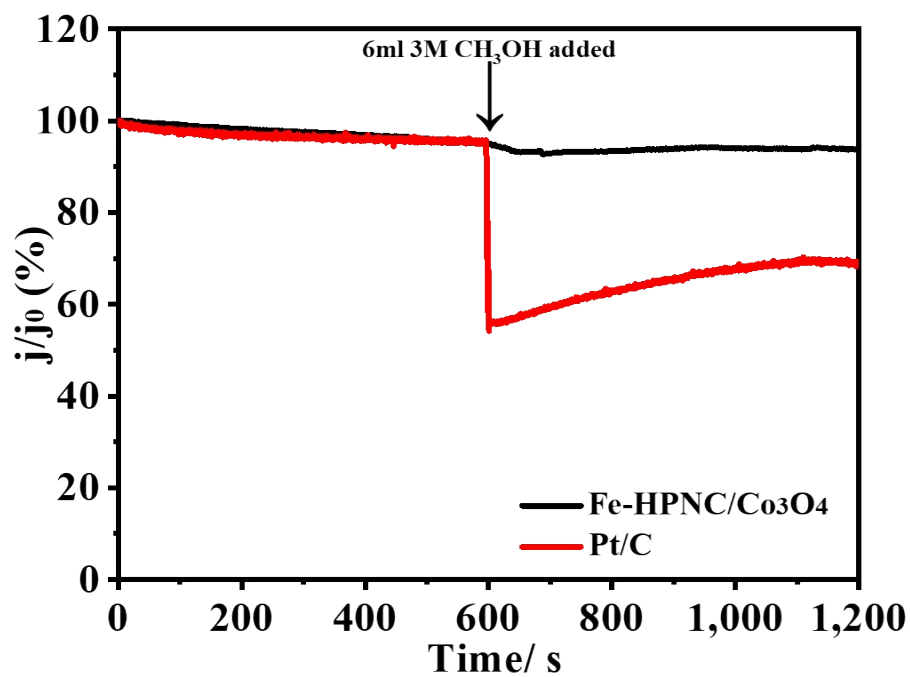

**Fig. S22** ORR chronoamperometric responses of Fe-HPNC/Co<sub>3</sub>O<sub>4</sub> and Pt/C at 0.65 V (vs. RHE) and 1600 rpm in O<sub>2</sub>-saturated 0.1 M KOH solution with the addition of 6 ml 3 M methanol.

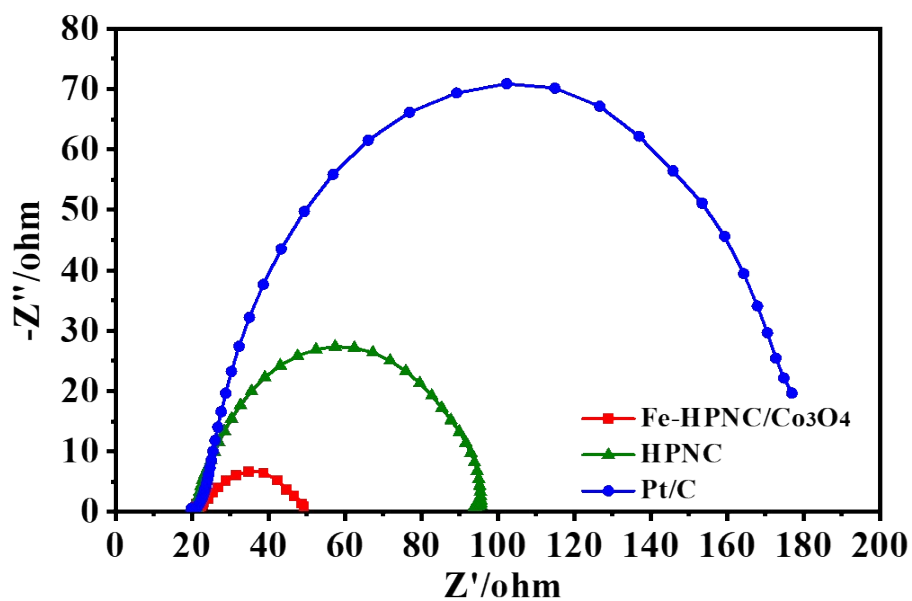

**Fig. S23** Electrochemical impedance spectrum (EIS) of Fe-HPNC /Co<sub>3</sub>O<sub>4</sub>, HPNC and Pt/C at 0.85 V (vs. RHE) with the frequency ranging 10 kHz to 0.01 Hz and an amplitude of 5 mV in O<sub>2</sub>-saturated 0.1 M KOH solution.



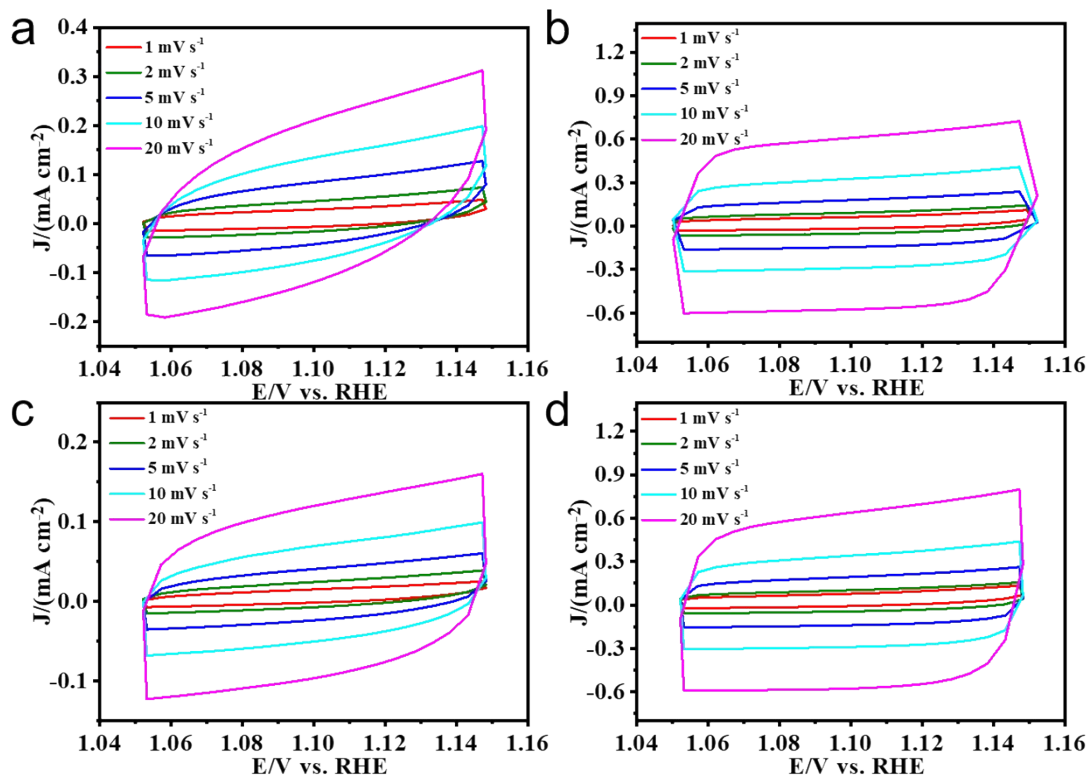

**Fig. S24** CV curves of (a) Fe-HPNC-700, (b) Fe-HPNC-800, (c) Fe-HPNC-900 and (d) Fe-HPNC/Co<sub>3</sub>O<sub>4</sub> with different scan rates in 0.1 M KOH solution.

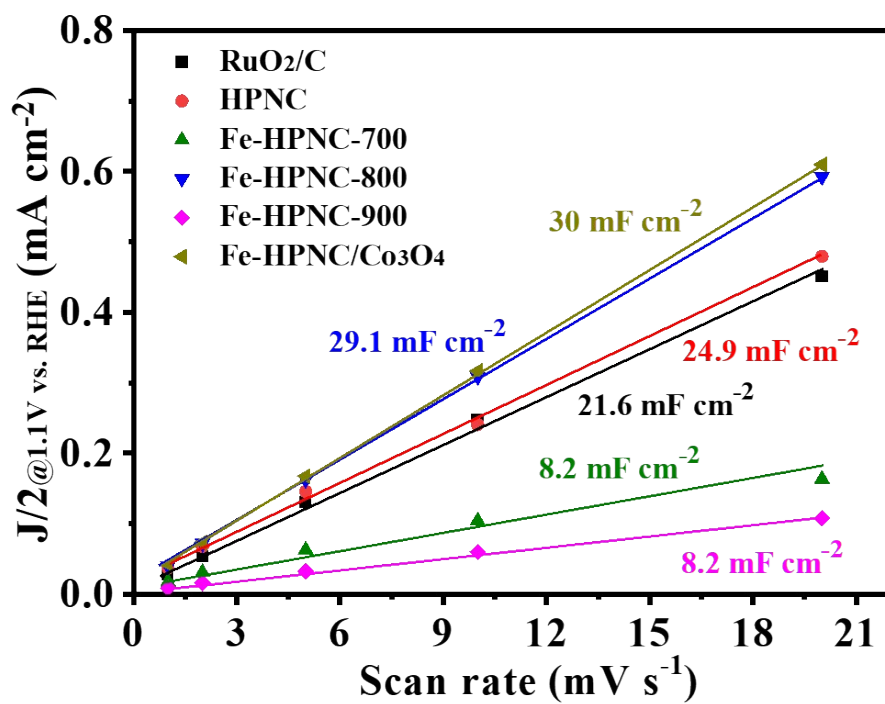

Fig. S25 Comparison of the electrochemical surface areas of various catalysts.

**Fig. S26** Schematic illustration of the fabricated Zn-air battery.

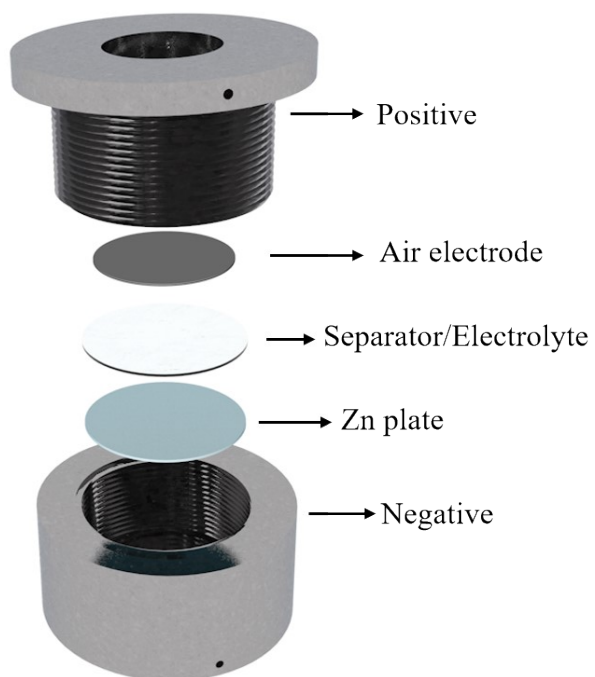

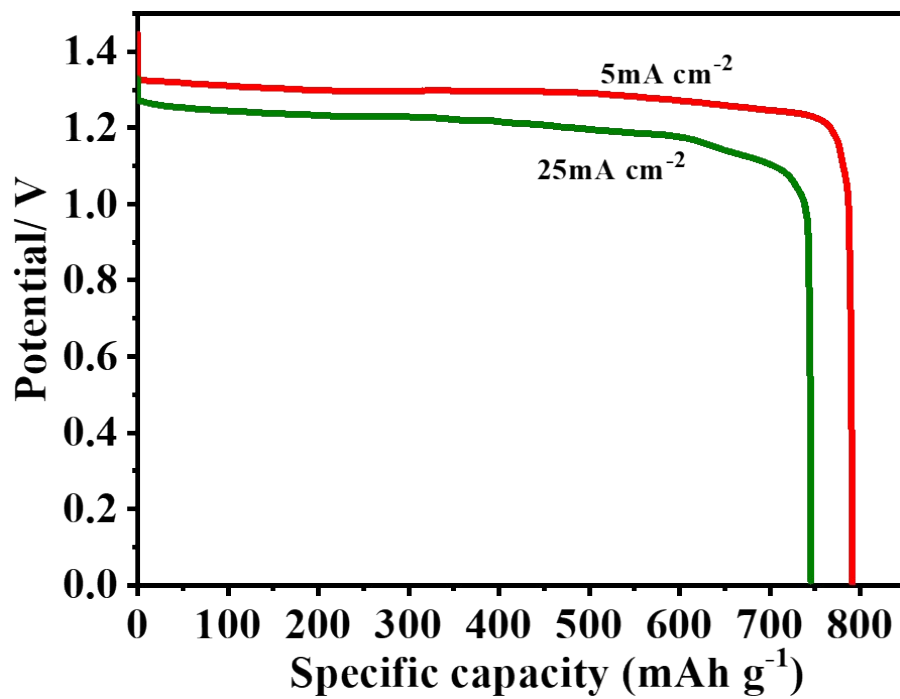

**Fig. S27** Galvanostatic discharge curves of Zn-air battery employing Fe-HPNC/Co<sub>3</sub>O<sub>4</sub> as cathodic catalysts at 5 mA cm<sup>-2</sup> and 25 mA cm<sup>-2</sup>.

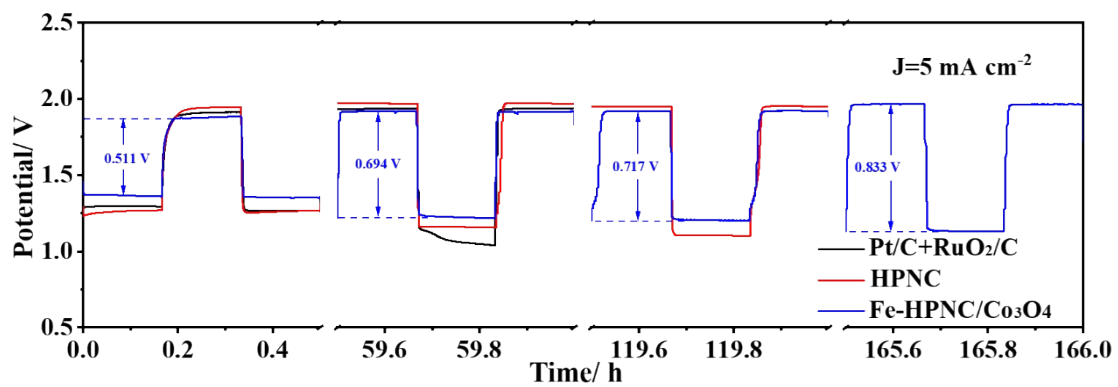

**Fig. S28** Galvanostatic discharge-charge cycling curves of Zn-air batteries employing Pt/C+RuO<sub>2</sub>/C, HPNC and Fe-HPNC/Co<sub>3</sub>O<sub>4</sub> as cathodic catalysts at 5 mA cm<sup>-2</sup> showing the changes of the voltage windows.

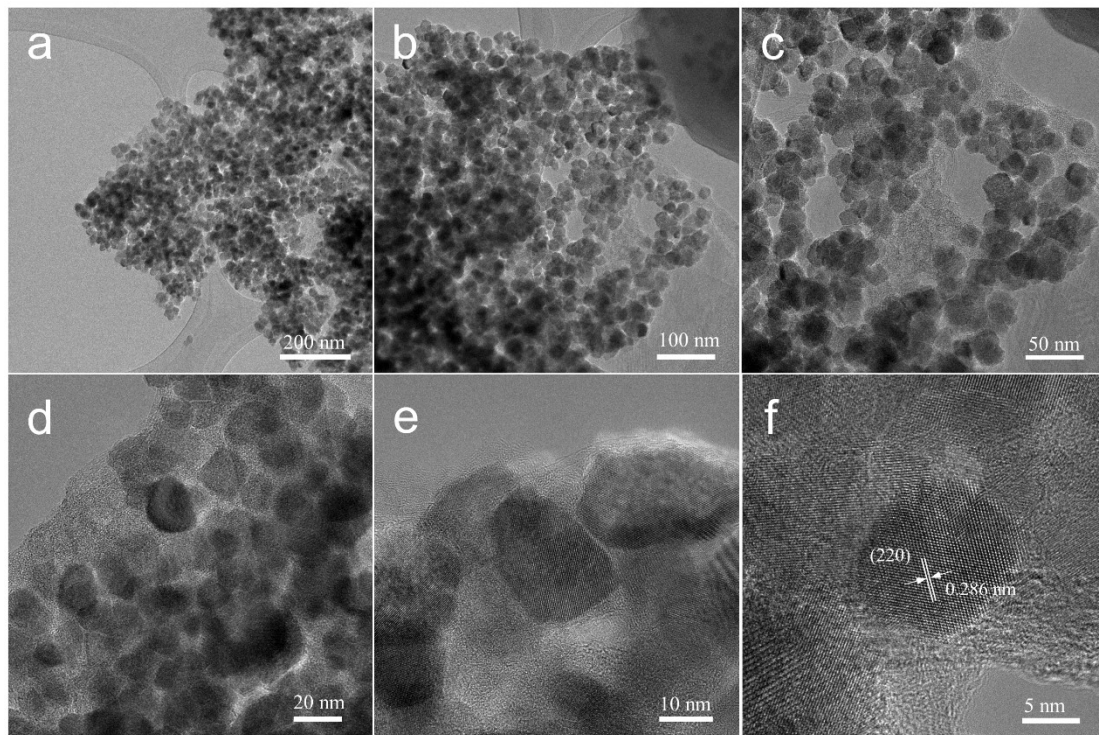

**Fig. S29 (a-f)** TEM and HR-TEM images of Fe-HPNC/Co<sub>3</sub>O<sub>4</sub> after the long-term stability test of Zn-air batteries.

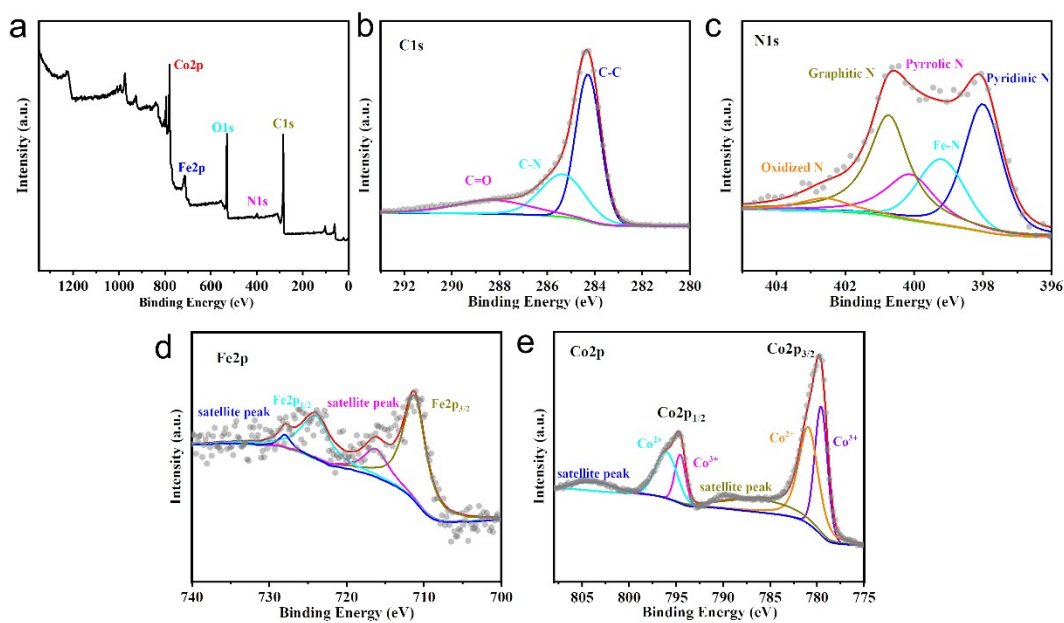

**Fig. S30** (a) XPS survey spectra and high-resolution (b) C 1s, (c) N 1s, (d) Fe 2p and (e) Co 2p spectra of Fe-HPNC/Co<sub>3</sub>O<sub>4</sub> after the long-term stability test of Zn-air batteries.

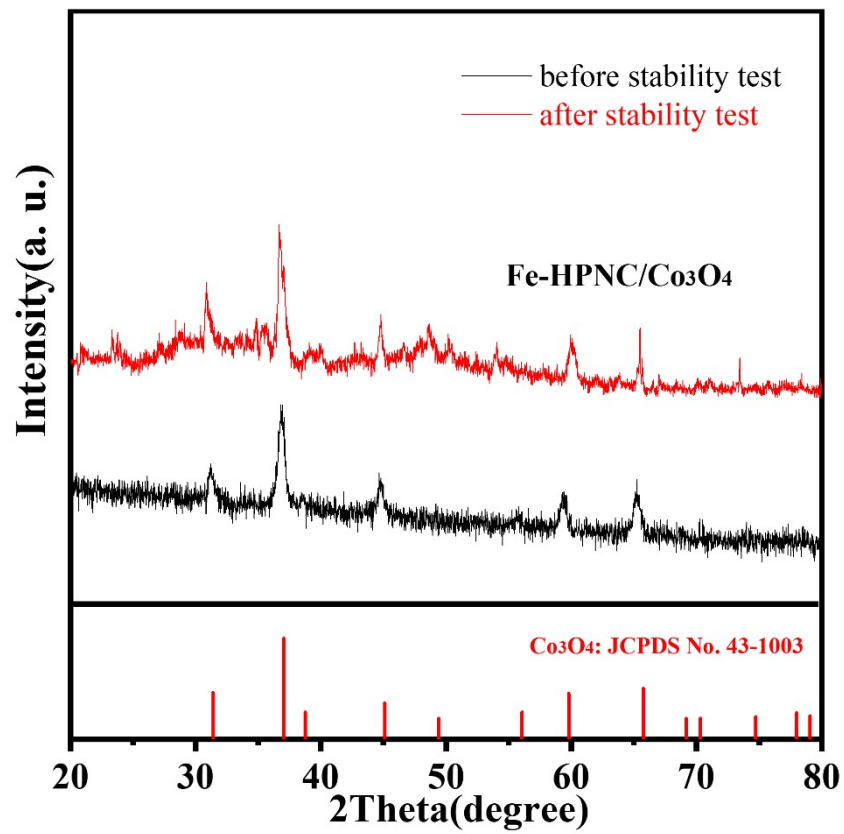

**Fig. S31** XRD patterns of Fe-HPNC/Co<sub>3</sub>O<sub>4</sub> before and after the long-term stability test of Zn-air batteries.



**Table S1** Comparison of the porosity of various catalysts.

| Sample                           | $S_{\text{BET}}$ ( $\text{m}^2 \text{g}^{-1}$ ) | $S_{\text{micro}}$ ( $\text{m}^2 \text{g}^{-1}$ ) | $S_{\text{meso}}$ ( $\text{m}^2 \text{g}^{-1}$ ) | Total pore volume ( $\text{cm}^3 \text{g}^{-1}$ ) |
|----------------------------------|-------------------------------------------------|---------------------------------------------------|--------------------------------------------------|---------------------------------------------------|
| Fe-HPNC                          | 1083.831                                        | 224.441                                           | 859.39                                           | 2.661                                             |
| Fe-HPNC/ $\text{Co}_3\text{O}_4$ | 708.268                                         | 156.775                                           | 551.492                                          | 1.447                                             |
| HPNC                             | 1458.991                                        | 369.012                                           | 1089.98                                          | 2.617                                             |
| $\text{Co}_3\text{O}_4$          | 61.493                                          | 49.511                                            | 11.912                                           | 0.197                                             |

**Table S2** Elemental contents of various catalysts based on XPS results.

| sample                                 | C wt% | N wt% | O wt% | Fe wt% | Co wt% |
|----------------------------------------|-------|-------|-------|--------|--------|
| Fe-HPNC-1:1                            | 86.97 | 5.07  | 5.72  | 2.24   | /      |
| Fe-HPNC-2:1                            | 86.23 | 4.67  | 5.67  | 3.45   | /      |
| Fe-HPNC-4:1                            | 85.95 | 4.55  | 5.25  | 4.25   | /      |
| Fe-HPNC-700                            | 83.73 | 4.8   | 6.56  | 4.31   | /      |
| Fe-HPNC-800                            | 86.23 | 4.67  | 5.67  | 3.45   | /      |
| Fe-HPNC-900                            | 87.79 | 4.54  | 5.48  | 2.19   | /      |
| Fe-HPNC/Co <sub>3</sub> O <sub>4</sub> | 63.01 | 2.96  | 22.58 | 2.71   | 7.89   |

**Table S3** Fe and Co contents of various catalysts based on ICP-OES results.

| <b>sample</b>                          | <b>Fe wt%</b> | <b>Co wt%</b> |
|----------------------------------------|---------------|---------------|
| Fe-HPNC-1:1                            | 0.34          | /             |
| Fe-HPNC-2:1                            | 2.04          | /             |
| Fe-HPNC-4:1                            | 2.84          | /             |
| Fe-HPNC-700                            | 2.46          | /             |
| Fe-HPNC-800                            | 2.04          | /             |
| Fe-HPNC-900                            | 1.12          | /             |
| Fe-HPNC/Co <sub>3</sub> O <sub>4</sub> | 1.56          | 7.29          |

**Table S4** Fe K-edge EXAFS curve fitting parameters.

| Samples | Path  | $C_N$  | R(Å) | $\sigma^2(\text{Å}^2)$ | R factor |
|---------|-------|--------|------|------------------------|----------|
| Fe-HPNC | Fe-N  | 1.6(6) | 2.00 | 0.002(1)               | 0.02     |
|         | Fe-O  | 0.3(8) | 2.16 | 0.005(2)               |          |
|         | Fe-C1 | 1.2(6) | 2.98 | 0.003(1) <sup>a</sup>  |          |
|         | Fe-C2 | 0.8(4) | 3.46 | 0.003(1) <sup>a</sup>  |          |

$C_N$  is coordination number; R is the distance between absorber and backscatter atoms; R factor indicates the goodness of the fit;  $\sigma^2$  is Debye-waller factor. The Debye-waller factors were constrained as  $\sigma^2(\text{Fe-C1}) = \sigma^2(\text{Fe-C2})$  for decreasing the correlation<sup>a</sup>.  $\Delta E_0$  is inner potential correction which is smaller than 10;  $S_0^2$  is the amplitude reduction factor, which is fixed to be 0.75.

**Table S5** Comparisons of Fe content, active sites and ORR performance for Fe-HPNC and other Fe-based single-atom catalysts.

| Catalysts                     | Fe content (ICP-OES) | Active sites                                | $E_{1/2}$ (V vs. RHE) | Electrolyte                          | Ref.             |
|-------------------------------|----------------------|---------------------------------------------|-----------------------|--------------------------------------|------------------|
| Fe-HPNC                       | 2.04 wt%)            | FeN <sub>2</sub>                            | 0.886                 | 0.1 M KOH                            | <i>This work</i> |
| Fe <sub>SA</sub> -N-C         | 1.76 wt%             | FeN <sub>4</sub>                            | 0.891                 | 0.1 M KOH                            | 1                |
| Fe-Z8-C                       | 3 wt%                | FeN <sub>4</sub>                            | 0.871                 | 0.1 M KOH                            | 2                |
| FeNCNs-800                    | 0.44 at%             | FeN <sub>4</sub><br>and<br>FeN <sub>x</sub> | 0.89                  | 0.1 M KOH                            | 3                |
| SA-Fe-NHPC                    | 1.25 wt%             | FeN <sub>x</sub>                            | 0.93                  | 0.1 M KOH                            | 4                |
| Fe SAC-MIL101-1000            | 1.27 wt%             | FeN <sub>x</sub>                            | 0.94                  | 0.1 M KOH                            | 5                |
| HSAC/Fe-3                     | 2.78 wt%             | FeN <sub>4</sub>                            | 0.814                 | 0.5 M H <sub>2</sub> SO <sub>4</sub> | 6                |
| FeNC-CVD-750                  | 2.0 wt%              | FeN <sub>4</sub>                            | 0.85                  | 0.5 M H <sub>2</sub> SO <sub>4</sub> | 7                |
| Fe, Mn/N-C                    | 2.3 wt%              | Fe, Mn-N <sub>6</sub>                       | 0.928                 | 0.1 M KOH                            | 8                |
| KB-tpy-Fe-700                 | -                    | FeN <sub>3</sub>                            | 0.81                  | 0.1 M KOH                            | 9                |
| Fe-N-C-900                    | 0.66 at%             | FeN <sub>2</sub>                            | 0.927                 | 0.1 M KOH                            | 10               |
| Fe-SNC                        | 0.34 at%             | FeN <sub>2</sub>                            | 0.77                  | 0.5 M H <sub>2</sub> SO <sub>4</sub> | 11               |
| FeCo/FeN <sub>2</sub> /NH OPC | 0.73 at%             | Fe-N <sub>2</sub>                           | 0.86                  | 0.1 M KOH                            | 12               |
| FeN <sub>2</sub> -NOMC        | 0.5 at%              | Fe-N <sub>2</sub>                           | 0.863                 | 0.1 M KOH                            | 13               |

**Table S6** Comparisons of bifunctional electrocatalytic activities and the performance of the fabricated Zn-air batteries based on Fe-HPNC/Co<sub>3</sub>O<sub>4</sub> and other recently reported non-noble metal catalysts.

| Catalysts                                  | E <sub>1/2</sub> (V vs. RHE) | E <sub>j=10</sub> (V vs. RHE) | ΔE (V) | Peak Power Density (mW cm <sup>-2</sup> ) | Durability                        | Ref.             |
|--------------------------------------------|------------------------------|-------------------------------|--------|-------------------------------------------|-----------------------------------|------------------|
| Fe-HPNC/Co <sub>3</sub> O <sub>4</sub>     | 0.886                        | 1.457                         | 0.571  | 236                                       | 165 h at 5 mA cm <sup>-2</sup>    | <i>This work</i> |
| HPNC                                       | 0.854                        | 1.474                         | 0.62   | 201                                       | 120 h at 5 mA cm <sup>-2</sup>    | 14               |
| Co <sub>3</sub> O <sub>4</sub> C-NA        | 0.78                         | 1.52                          | 0.74   | -                                         | -                                 | 15               |
| Co@Co <sub>3</sub> O <sub>4</sub> /NC      | 0.80                         | 1.65                          | 0.85   | -                                         | -                                 | 16               |
| Co <sub>3</sub> O <sub>4</sub> /NPGC       | 0.842                        | 1.725                         | 0.883  | 84                                        | 80 h at 5 mA cm <sup>-2</sup>     | 17               |
| Co <sub>3</sub> O <sub>4</sub> /CC         | 0.79                         | 1.72                          | 0.93   | 35                                        | 25 h at 3 mA cm <sup>-2</sup>     | 18               |
| Co <sub>3</sub> O <sub>4</sub> -NP/N-rGO   | 0.76                         | 1.61                          | 0.85   | 118                                       | 1000 min at 5 mA cm <sup>-2</sup> | 19               |
| NC-Co <sub>3</sub> O <sub>4</sub> -90      | 0.87                         | 1.588                         | 0.718  | 82                                        | 210 h at 10 mA cm <sup>-2</sup>   | 20               |
| ZIF-L-D-Co <sub>3</sub> O <sub>4</sub> /CC | 0.9                          | 1.54                          | 0.64   | 74                                        | 384 h at 5 mA cm <sup>-2</sup>    | 21               |
| CoO <sub>x</sub> /N-RGO                    | 0.896                        | 1.6                           | 0.704  | 120                                       | 10 h at 6 mA cm <sup>-2</sup>     | 22               |
| NP-Co <sub>3</sub> O <sub>4</sub> /CC      | 0.9                          | 1.56                          | 0.66   | 200                                       | 400 h at 5 mA cm <sup>-2</sup>    | 23               |
| Co/Co <sub>3</sub> O <sub>4</sub> @CoS-SNC | 0.86                         | 1.59                          | 0.73   | 101                                       | 1000 min at 5 mA cm <sup>-2</sup> | 24               |
| MnO/Co/PGC                                 | 0.78                         | 1.6                           | 0.82   | 172                                       | 75 h at 10 mA cm <sup>-2</sup>    | 25               |
| N-CoS <sub>2</sub> -YSSs                   | 0.81                         | 1.6                           | 0.79   | 81                                        | 165 h at 10 mA cm <sup>-2</sup>   | 26               |
| CNT@SAC-Co/NCP                             | 0.87                         | 1.61                          | 0.74   | 172                                       | 210 h at 5 mA cm <sup>-2</sup>    | 27               |

**Table S7.** Comparison of elemental contents of Fe-HPNC/Co<sub>3</sub>O<sub>4</sub> before and after the cycling of Zn-air batteries according to XPS results.

| sample                                                     | C wt% | N wt% | O wt% | Fe wt% | Co wt% |
|------------------------------------------------------------|-------|-------|-------|--------|--------|
| Fe-HPNC/Co <sub>3</sub> O <sub>4</sub><br>(before cycling) | 63.01 | 2.96  | 22.58 | 2.71   | 7.89   |
| Fe-HPNC/Co <sub>3</sub> O <sub>4</sub><br>(after cycling)  | 62.02 | 2.46  | 24.36 | 2.42   | 8.73   |

## References

- 1 L. Jiao, G. Wan, R. Zhang, H. Zhou, S. H. Yu and H. L. Jiang, *Angew. Chem. Int. Ed.*, 2018, **57**, 8525-8529.
- 2 Q. T. Liu, X. F. Liu, L. R. Zheng and J. L. Shui, *Angew. Chem. Int. Ed.*, 2018, **57**, 1204-1208.
- 3 X. Ao, W. Zhang, Z. Li, L. Lv, Y. Ruan, H. Wu, W. Chiang, C. Wang, M. Liu and Zeng, X. *J. Mater. Chem. A*, 2019, **7**, 11792-11801.
- 4 G. Chen, P. Liu, Z. Liao, F. Sun, Y. He, H. Zhong, T. Zhang, E. Zschech, M. Chen, G. Wu, J. Zhang, X. Feng, *Adv. Mater.*, 2020, **32**, 1907399.
- 5 X. Xie, L. Peng, H. Yang, G. I. N. Waterhouse, L. Shang and T. Zhang, *Adv. Mater.*, 2021, **33**, 2101038.
- 6 J. Guo, B. Li, Q. Zhang, Q. Liu, Z. Wang, Y. Zhao, J. Shui, Z. Xiang, *Adv. Sci.*, 2021, **8**, 2002249.
- 7 L. Jiao, J. Li, L. L. Richard, Q. Sun, T. Stracensky, E. Liu, M. T. Sougrati, Z. Zhao, F. Yang, S. Zhong, H. Xu, S. Mukerjee, Y. Huang, D. A. Cullen, J. H. Park, M. Ferrandon, D. J. Myers, F. Jaouen and Q. Jia, *Nat. Mater.*, 2021, **20**, 1385-1391.
- 8 G. Yang, J. Zhu, P. Yuan, Y. Hu, G. Qu, B. Lu, A. Xue, X. H. Yin, W. Cheng, J. Cheng, W. Xu, J. Li, J. Hu, S. Mu and J. N. Zhang, *Nat. Commun.*, 2021, **12**, 1734.
- 9 M. F. Holly, I. I. Ebralidze, P. D. Meline, O. V. Zenkina and E. B. Easton, *J. Electrochem. Soc.*, 2020, **167**, 084520.
- 10 C. Zhu, Q. Shi, B. Z. Xu, S. Fu, G. Wan, C. Yang, S. Yao, J. Song, H. Zhou, D. Du, S. P. Beckman, D. Su and Y. Lin, *Adv. Energy Mater.*, 2018, **8**, 1801956.
- 11 H. Shen, E. G. Espino, J. Ma, K. Zang, J. Luo, L. Wang, S. Gao, X. Mamat, G. Hu, T. Wagberg and S. Guo, *Angew. Chem. Int. Ed.*, 2017, **56**, 13800-13804.
- 12 Y. Wang, M. F. Qiao and X. Mamat, *Chem. Eng. J.*, 2020, **402**, 126214.
- 13 H. Shen, E. G. Espino, J. Ma, H. Tang, X. Mamat, T. Wagberg, G. Hu and S. Guo, *Nano Energy*, 2017, **35**, 9-16.
- 14 F. Gui, Q. Jin, D. Xiao, X. Xu, Q. Tan, D. Yang, B. Li, P. Ming, C. Zhang, Z. Chen, S. Siahrostami and Q. Xiao, *Small*, 2022, **18**, 2105928.
- 15 T. Y. Ma, S. Dai, J. Mietek and S. Z. Qiao, *J. Am. Chem. Soc.*, 2014, **136**, 13925-13931.
- 16 A. Aijaz, J. Masa, C. Rösler, W. Xia, P. Weide, A. J. R. Botz, R. A. Fischer and W. Schuhmann, *Angew. Chem. Int. Ed.*, 2016, **55**, 4087-4091.
- 17 G. Li, X. Wang, J. Fu, J. Li, M. G. Park, Y. Zhang, G. Lui and Z. Chen, *Angew. Chem. Int. Ed.*, 2016, **55**, 4977-4982.
- 18 Y. Li, C. Zhong, J. Liu, X. Zeng, S. Qu, X. Han, Y. Deng, W. Hu and J. Lu, *Adv. Mater.*, 2018, **30**, 1703657.
- 19 X. Han, G. He, Y. He, J. Zhang, X. Zheng, L. Li, C. Zhong, W. Hu, Y. Deng and T. Y. Ma, *Adv. Energy Mater.*, 2018, **8**, 1702222.
- 20 C. Guan, A. Sumboja, H. Wu, W. Ren, X. Liu, H. Zhang, Z. Liu, C. Cheng, S. J. Pennycook and J. Wang, *Adv. Mater.*, 2017, **29**, 1704117.



- 21 Y. Zhang, Z. Pan, X. Wang, J. Yang, Y. Qiu, S. Xu, Y. Lu, Q. Huang and W. Li, *Adv. Sci.*, 2019, **6**, 1802243.
- 22 T. Zhou, W. Xu, N. Zhang, Z. Du, C. Zhong, W. Yan, H. Ju, W. Chu, H. Jiang, C. Wu, Y. Xie, *Adv. Mater.*, 2019, **31**, 1807468.
- 23 X. Wang, Z. Liao, Y. Fu, C. Neumann, A. Turchanin, G. Nam, E. Zschech, J. Cho, J. Zhang, X. Feng, *Energy Stor. Mater.*, 2020, **26**, 157-164.
- 24 H. Pan, X. Huang, Z. Lu, Z. Zhang, B. An, D. Wu, T. Wang, X. Chen, F. Cheng, *Chem. Eng. J.*, 2021, **419**, 129619.
- 25 X. F. Lu, Y. Chen, S. Wang, S. Gao and X. W. Lou, *Adv. Mater.*, 2019, **31**, 1902339.
- 26 X. F. Lu, S. L. Zhang, E. Shangguan, P. Zhang, S. Gao and X. W. Lou, *Adv. Sci.*, 2020, **7**, 2001178.
- 27 J. C. Li, Y. Meng, L. Zhang, G. Li, Z. Shi, P. X. Hou, C. Liu, H. M. Chen and M. Shao, *Adv. Funct. Mater.*, 2021, **31**, 2103360.
